# Supplementary material for: Control of cotton fibre elongation by a homeodomain transcription factor GhHOX3
Source: PubMed Central journal article supplement (PMC4263147; doi:10.1038/ncomms6519), 2014-11-21
Supplement: ncomms6519-s1.pdf [file ncomms6519-s1.pdf]

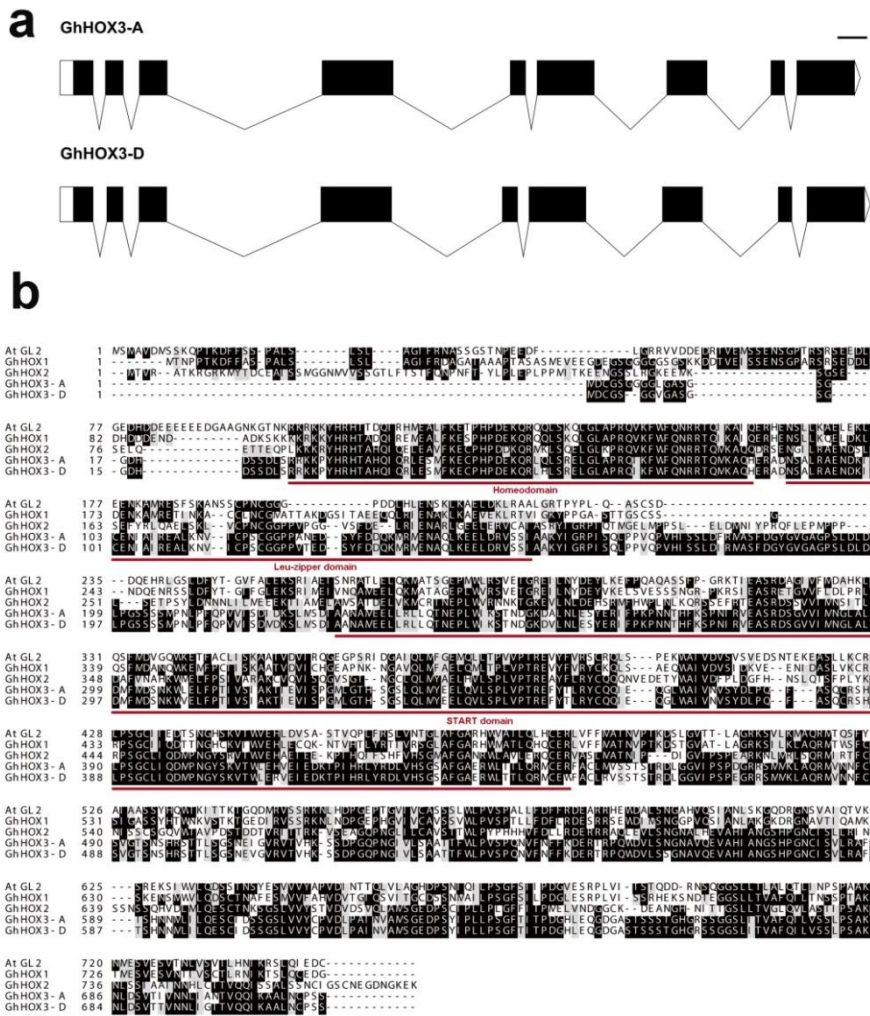

## Supplementary Figure 1 Overview of *GhHOX3* gene.

(a) Schematic show of cotton (*Gossypium hirsutum*) *HOX3* gene, *GhHOX3*.

The length of both copies of *GhHOX3* coding region is around 5.4 kb,

containing 9 exons and 8 introns. Scale bar, 200bp. (b) Alignment of amino

acid sequences of GhHOX1 (GenBank: AF530913), GhHOX2 (GenBank:

AF530914), GhHOX3 and *Arabidopsis thaliana* GLABRA2 (AtGL2, GenBank:

L32873). *GhHOX3-A* (GenBank: KJ595847) and *GhHOX3-D* (GenBank:

KJ595848) sequences were obtained by amplifying *HOX3* cDNA from 6DPA

fiber cells. All proteins aligned here belong to the homeodomain-leucine zipper

(HD-ZIP) IV subfamily. The homoeologous GhHOX3-A and GhHOX3-D are 98%

identical with amino acid sequences. Protein sequences were aligned by

CLUSTALW (v1.81) following the default parameters. Conserved domains of

---

HD-ZIP IV proteins are underlined in red.

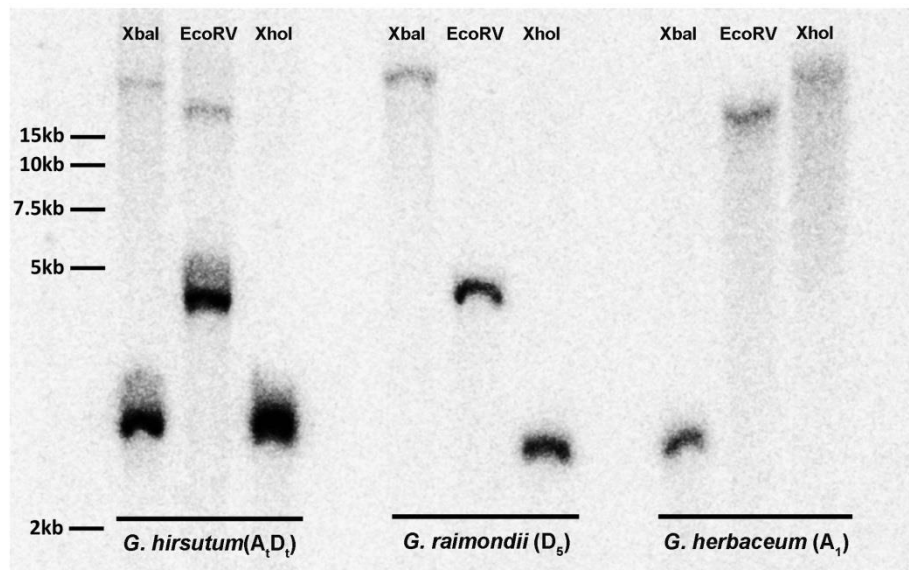

**Supplementary Figure 2** Southern blot detection of *GhHOX3*.

Genomic DNAs from *G. hirsutum* cv. R15 (allotetraploid A<sub>t</sub>D<sub>t</sub> genome), and its two proposed extant progenitor diploid species, *G. herbaceum* (A<sub>1</sub> genome) and *G. raimondii* (D<sub>5</sub> genome), were digested by Xba I, EcoR V and Xho I, respectively, and then hybridized with a *GhHOX3*-specific probe.

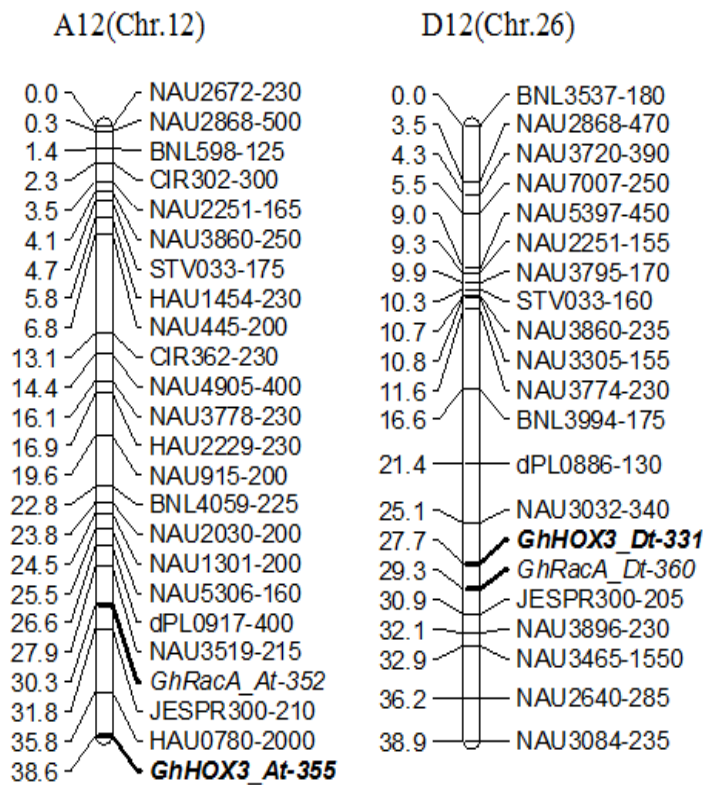

**Supplementary Figure 3** Molecular mapping of *GhHOX3* genes. The genes were localized in the 12th homoeologous chromosome set of allotetraploid cotton, using a population generated from the cross of (*G. hirsutum* acc. TM-1×*G. barbadense* cv. Hai7124)×TM-1. See also **Online Methods**.

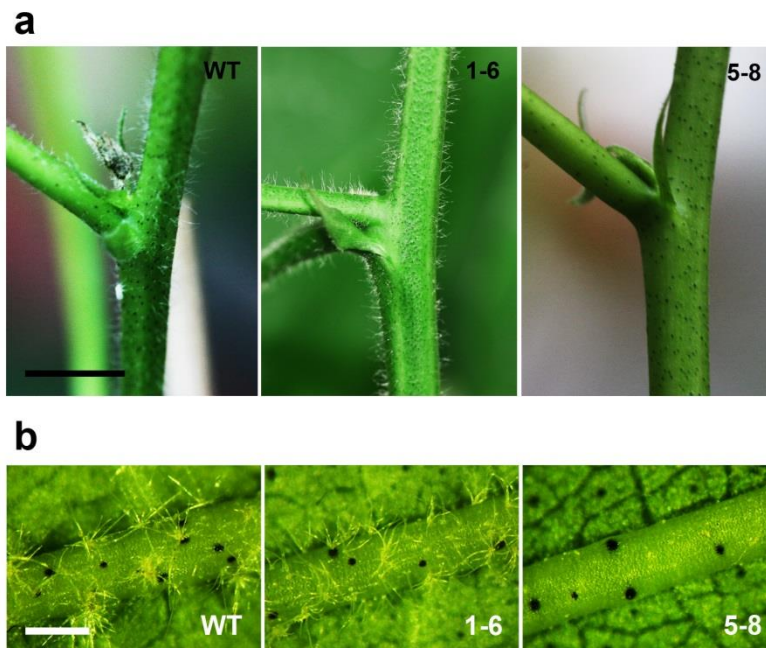

**Supplementary Figure 4** Trichome phenotypes of T<sub>2</sub> plants of 35S::*GhHOX3* transgenic lines 5-8 and 1-6.

**(a-b)** Images of trichome phenotypes on stem **(a)** and leaf vein **(b)**. *GhHOX3* expression was silenced in line 5-8 due to co-suppression, but not or only slightly affected in line 1-6 (see **Figure 1e**). The wild-type (WT) plant of *G. hirsutum* cv. R15 is shown as control. Scale bars, 1 cm in **(a)**, and 1 mm in **(b)**.

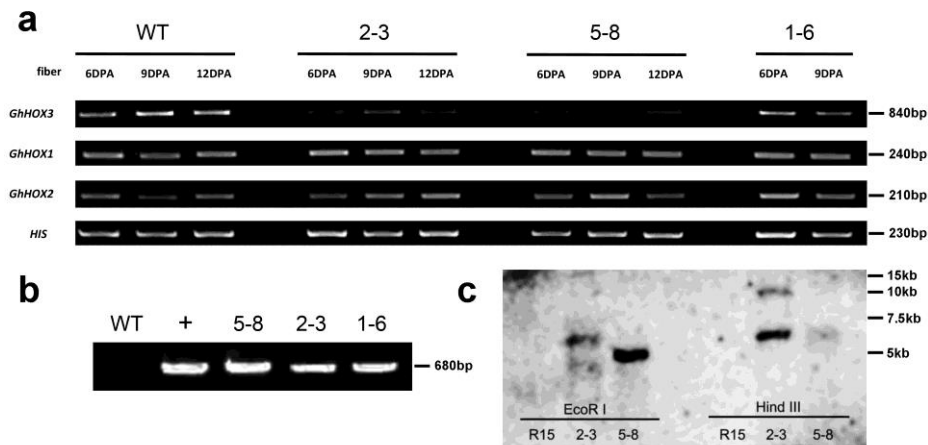

**Supplementary Figure 5** Analysis of *35S::GhHOX3* transgenic cotton lines.

**(a)** RT-PCR analysis of *GhHOX1/2/3* expression levels in fibers of T<sub>2</sub> plants of three *35S::GhHOX3* transgenic lines (2-3, 5-8, 1-6) and of the wild-type *G. hirsutum* cv. R15 (WT). Fiber cells of different developing stages as indicated were analyzed and *GhHIS3* was used as a reference. The analysis was repeated 3 times with consistent results. PCR cycles for *GhHOX1/2/3* was 25, 25 and 28, respectively. **(b)** PCR and **(c)** Southern blot detection of the transgene in T<sub>2</sub> plants of transgenic lines. Genomic DNAs were digested with *EcoR I* and *Hind III*, and then hybridized with a *NPT II* probe.

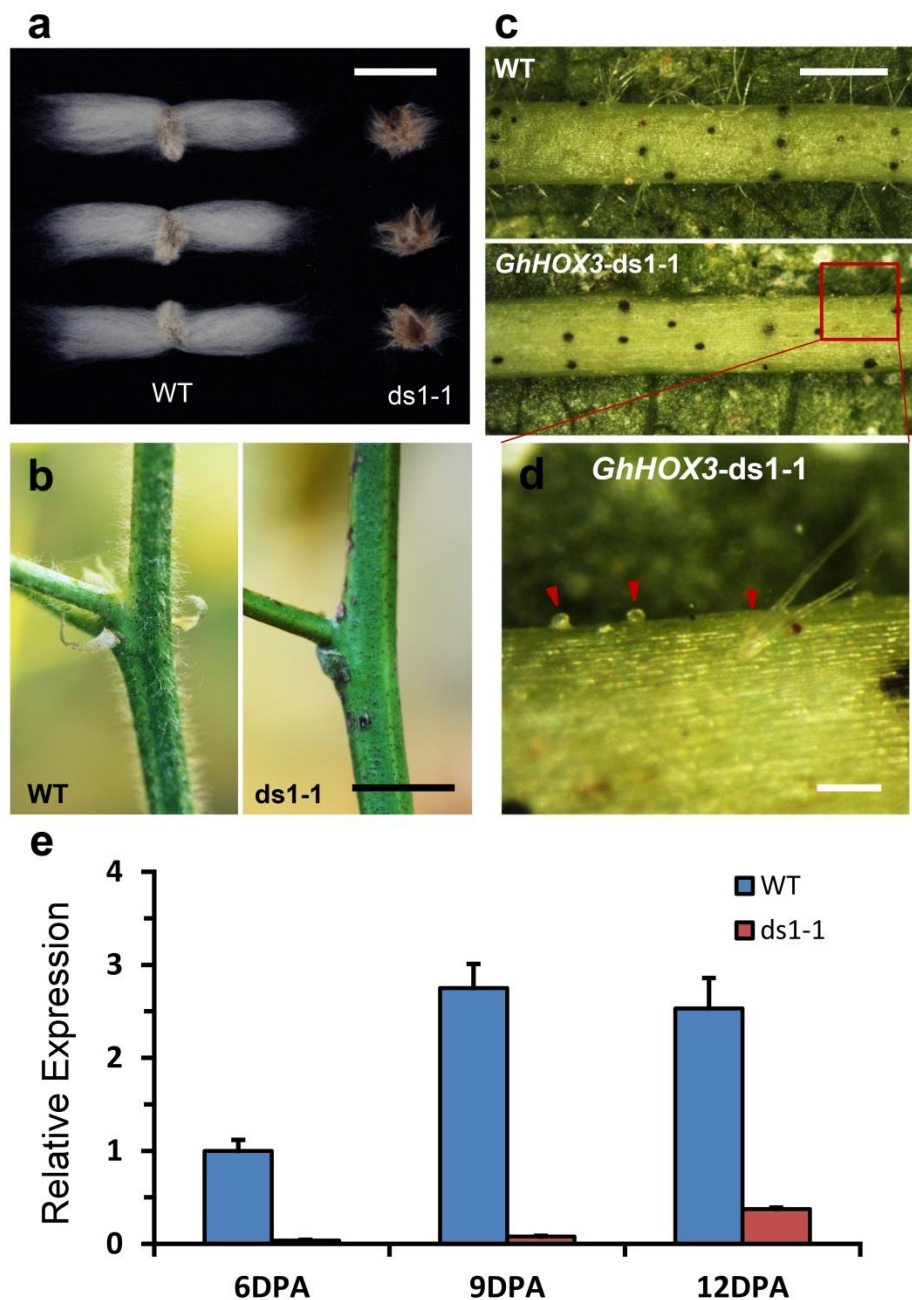

**Supplementary Figure 6** Fibers and stem trichomes of *GhHOX3* dsRNA transgenic plants.

**(a)** Fiber of a *GhHOX3* dsRNA line, ds1-1. **(b-d)** Trichome on stem **(b)** and leaf vein **(c,d)** of the line ds1-1 and the wild-type (WT) cotton; underdeveloped trichome shown in magnified square **(d)** is indicated by red arrow. Scale bars, 2 cm in **(a)**, 1 cm in **(b)**, 1 mm in **(c)**, and 100 μm in **(d)**. **(e)** Expression levels of *GhHOX3* in fibers of the wild-type and the RNAi line (ds1-1) examined by

qRT-PCR, data are shown as mean  $\pm$  s.e.m. (n=3).

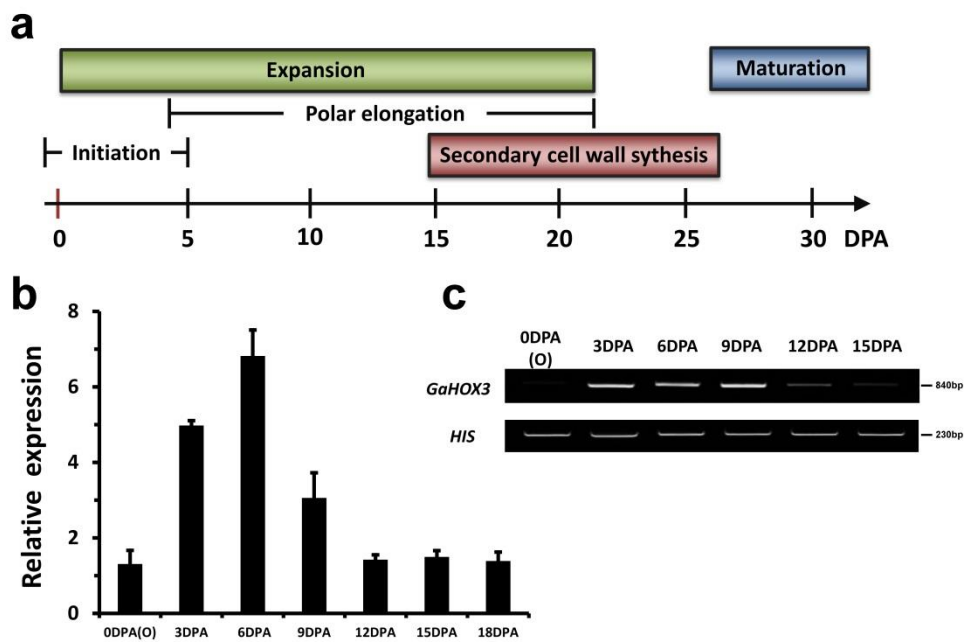

**Supplementary Figure 7** *HOX3* expression in cotton fiber cells of allotetraploid (*G. hirsutum*) and diploid (*G. arboreum*) cultivars grown in green house.

**(a)** Sketch of cotton fiber developing stages. **(b,c)** *GhHOX3* expression in ovule (0 DPA) and fiber collected at different DPA as indicated. The expression in *G. hirsutum* was analyzed by qRT-PCR **(b)** and in *G. arboreum* by RT-PCR **(c)**. For qRT-PCR, data are shown as mean  $\pm$  s.e.m. (n=3). For RT-PCR, analysis was repeated 3 times with consistent results.

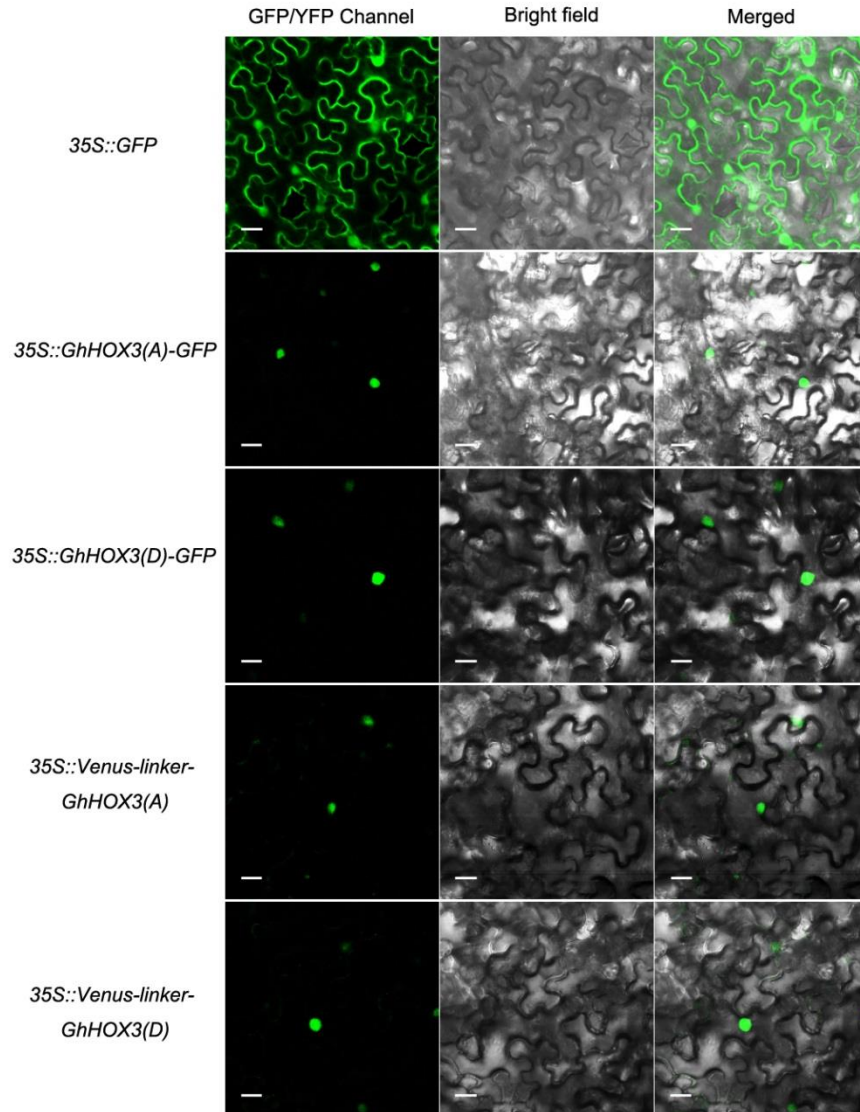

**Supplementary Figure 8** Subcellular localization of GhHOX3.

GFP/Venus(YFP) fluorescence proteins were fused to the C-terminal or N-terminal of GhHOX3-A and GhHOX3-D, respectively, and transiently expressed in *N. benthamiana* leaf cells via Agrobacteria infiltration. All the fluorescence signals were localized to the nucleus. Scale bars, 20  $\mu$ m.



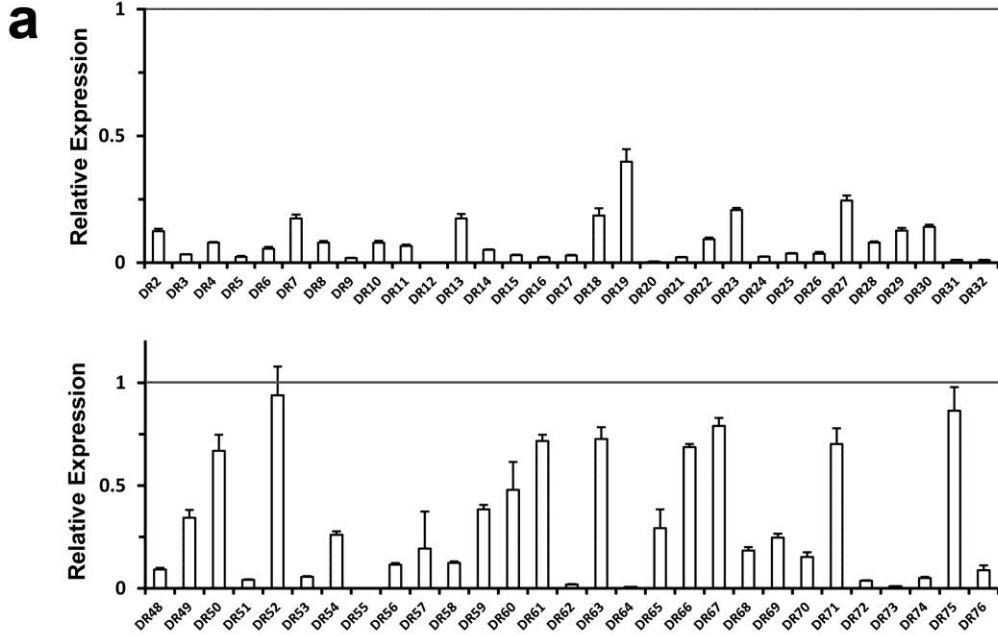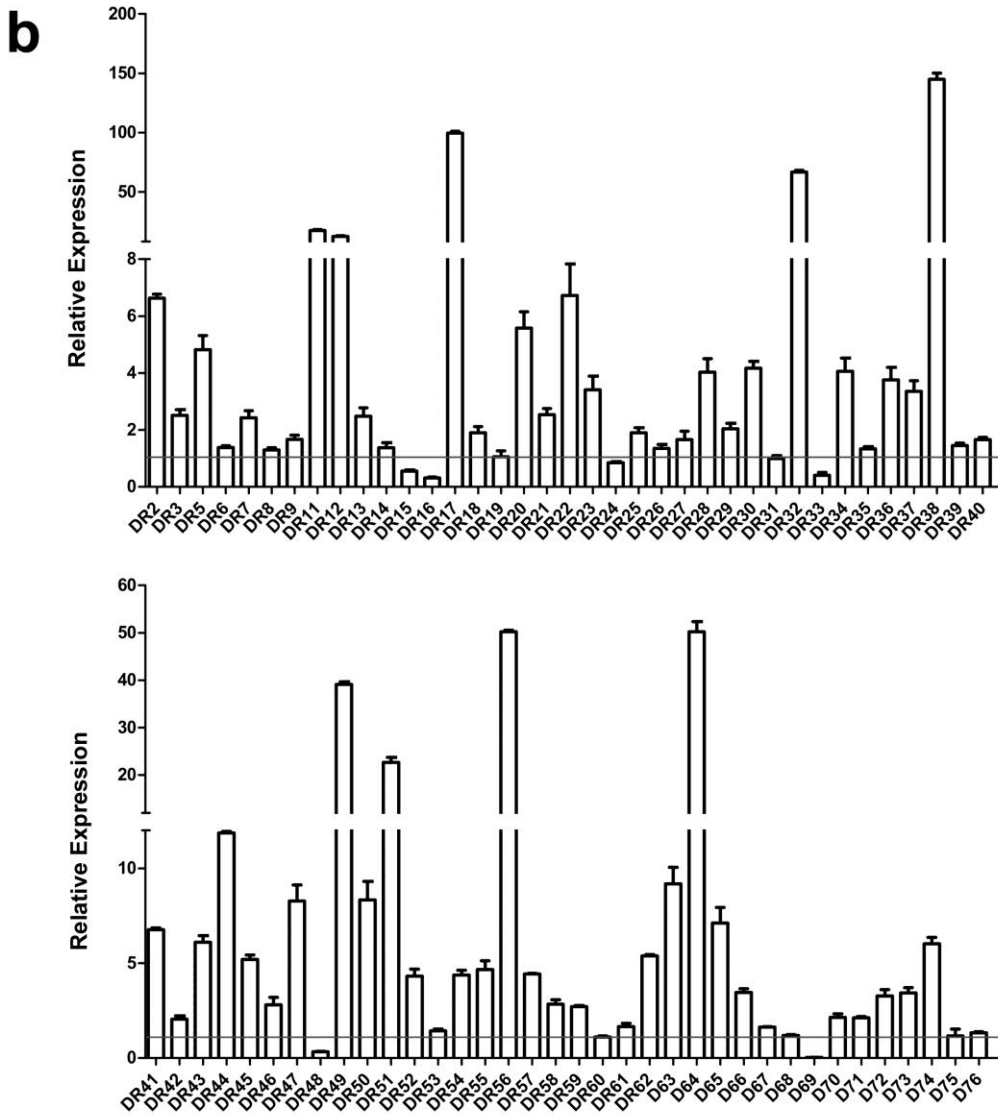

---

**Supplementary Figure 9** Identification of differentially expressed genes in *GhHOX3* co-suppression (line 5-8) and wild-type plants by qRT-PCR. Cotton fibers collected at 6 DPA were used for gene expression analysis.

Genes down-regulated in co-suppression line are shown in **(a)**, and up-regulated in over-expression line in **(b)**. The horizontal line indicates the expression level (normalized to 1) of each gene in wild-type *G. hirsutum* cv. R15. For gene identity, see **Supplementary Table 5**. Data are shown as mean  $\pm$  s.e.m. (n=3). For expression of *GhRDL1* (DR77, GenBank: AY072821) and *GhEXPA1* (DR78, GenBank: AF512539), see **Fig. 2a-d**.

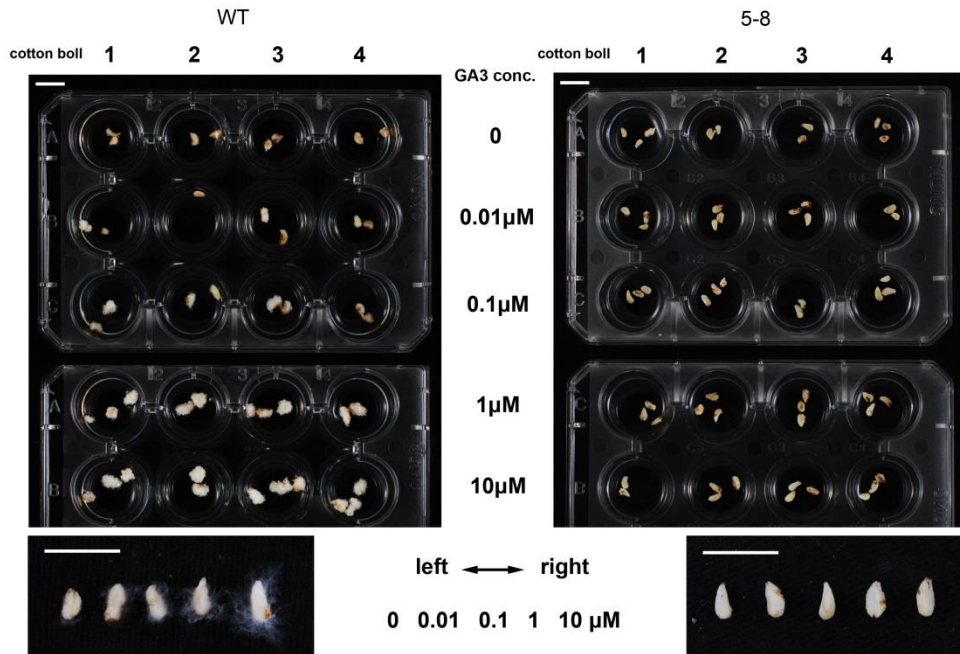

**Supplementary Figure 10** Effects of gibberellin (GA) on cotton fiber elongation.

Cotton ovules of wild-type (WT) and *GhHOX3* co-suppression line 5-8 were cultured *in vitro* under gradient concentrations (0~10 μM) of gibberellic acid (GA<sub>3</sub>) and a constant concentration (1 μM) of auxin, indole-3-acetic acid (IAA). The ovules harvested at 2 DPA were used a 6-day culture. Numbers on the top indicate ovules from the same cotton boll. Magnified view in bottom panel shows fibers elongated in ovules of the wild-type (left), but not the co-suppression line 5-8 (right). Scale bars, 1cm.

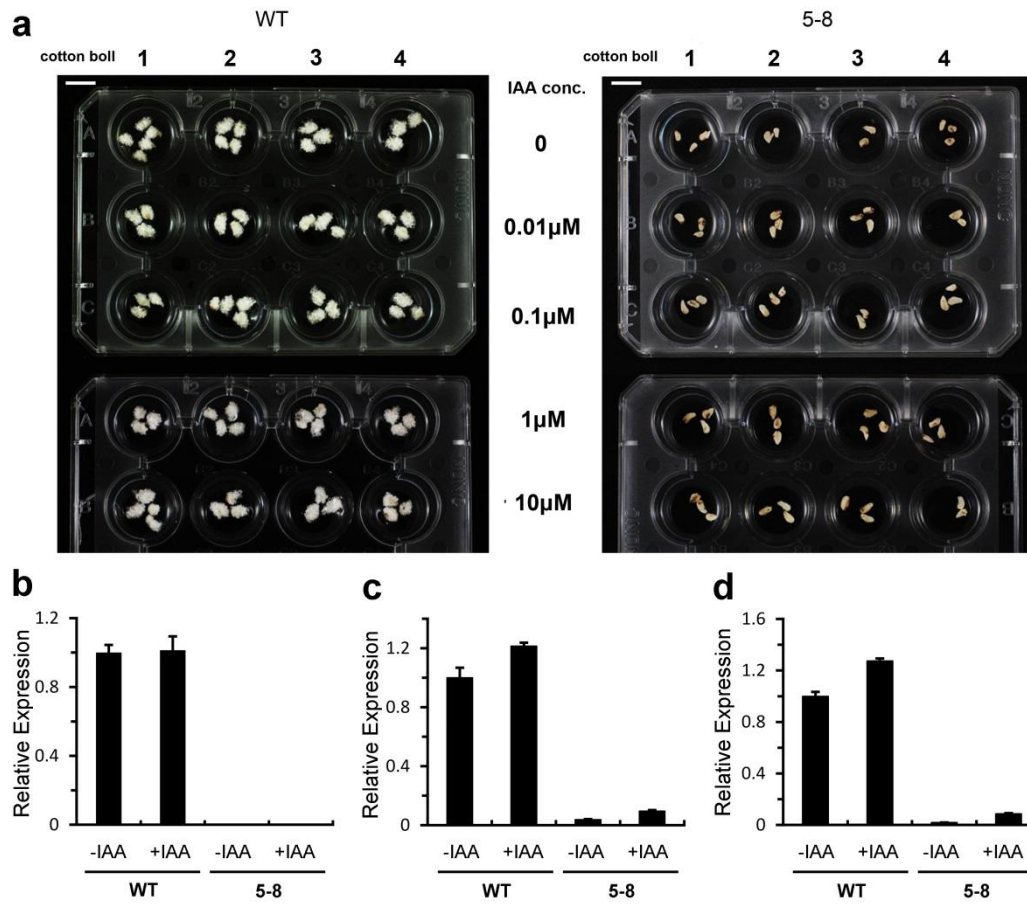

**Supplementary Figure 11** Effects of auxin on cotton fiber elongation.

**(a)** Cotton ovules of wild-type (WT) and *GhHOX3* co-suppression line 5-8 were cultured *in vitro* under gradient concentrations (0~10  $\mu$ M) of auxin and a constant concentration (1  $\mu$ M) of GA. The ovules harvested at 2 DPA were used for a 6-day culture. Numbers on the top indicate ovules from the same cotton boll. Scale bars, 1cm. **(b-d)** Expression level of *GhHOX3* **(b)** and its down-stream target genes *GhRDL1* **(c)** and *GhEXPA1* **(d)**. Data are shown as mean  $\pm$  s.e.m. (n=3).

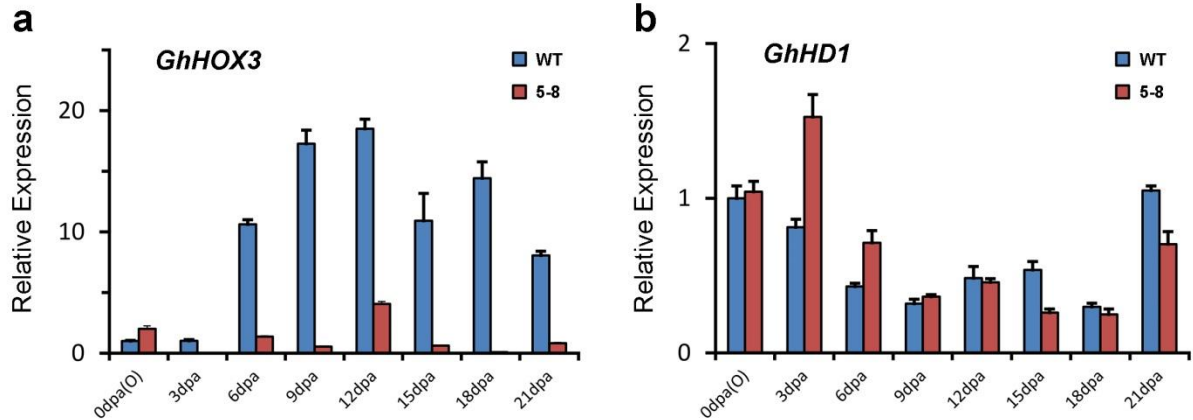

**Supplementary Figure 12** Expression of *GhHD1* (GenBank: DQ006269) in co-suppression line 5-8.

**(a,b)** Transcript levels of *GhHOX3* **(a)** and *GhHD1* **(b)** in line 5-8 and wild-type (WT) were detected by qRT-PCR. Cotton fiber or ovule (O) were harvested at different DPA as indicated. Data are shown as mean  $\pm$  s.e.m. (n=3).

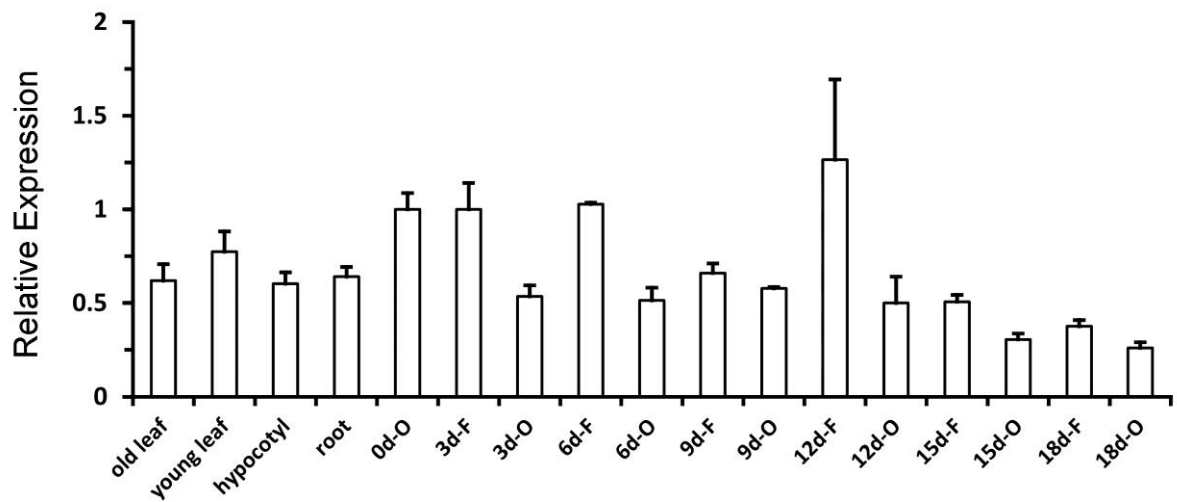

**Supplementary Figure 13** Expression pattern of *GhSLR1* in cotton (*G. hirsutum*).

Analysis of *GhSLR1* (GenBank: DQ006269) transcript levels in various organs of cotton by qRT-PCR. Old leaf, fully expanded leaf from 2-month old plant. Young leaf, not fully expanded true leaf from 2-week old plant. Cotton fiber (F) or ovule (O) were harvested at different DPA as indicated. Data are shown as mean  $\pm$  s.e.m. (n=3).

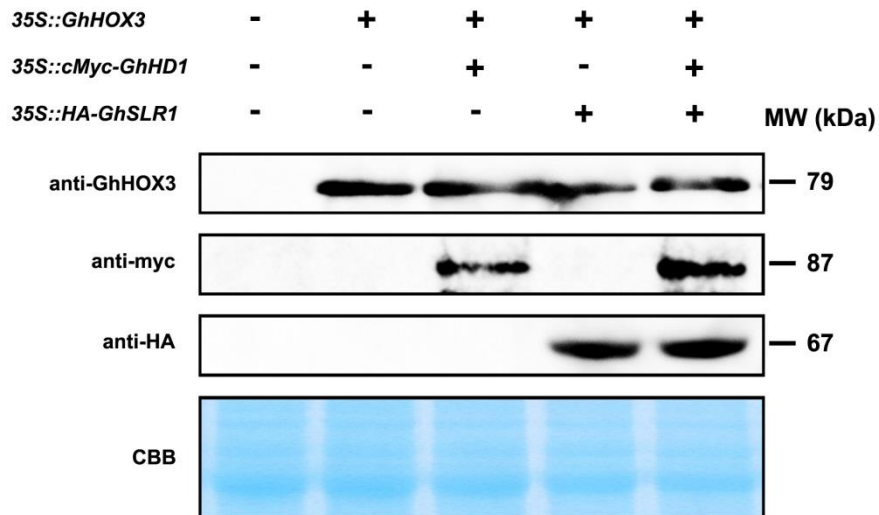

**Supplementary Figure 14** Western blot detection of protein amount in co-filtrated tobacco leaves.

GhHOX3, myc, and HA antibody were respectively used for detecting corresponding protein contents, as indicated. CBB: Coomassie Brilliant Blue staining of total protein extracted, as loading control.

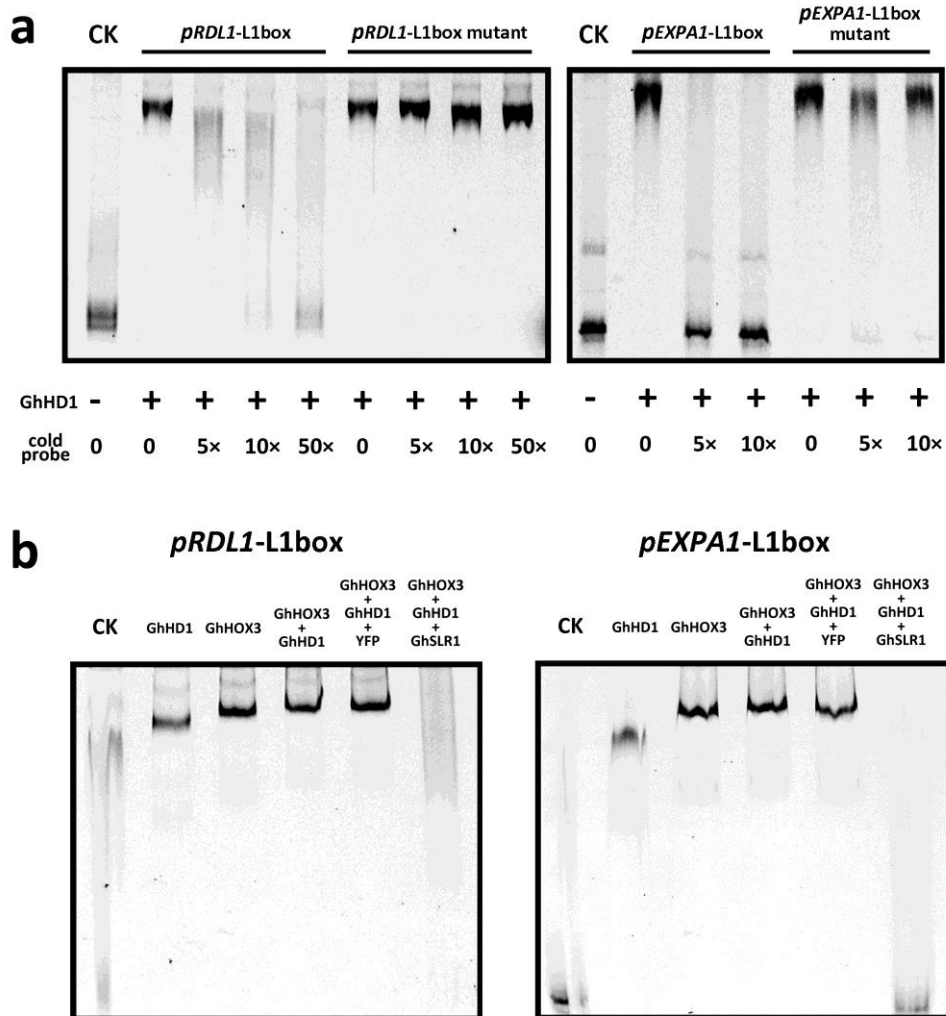

**Supplementary Figure 15** EMSA assay of binding of GhHD1 and GhHOX3 to L1-box cis-elements from the *GhRDL1* and *GhEXPA1* promoters.

**(a)** The 6 x fragments of *GhRDL1* and *GhEXPA1* promoters containing the intact or the mutated L1-box (see Fig. 2e) were used for the assay. Labeled *GhRDL1* and *GhEXPA1* fragments were incubated with 1  $\mu$ g of MBP-GhHD1 to compete with different concentrations (5x, 10x and 50x) of cold probes of either intact or mutated L1-box. **(b)** Fragments of *GhRDL1* and *GhEXPA1* promoters containing the intact or the mutated L1-box were incubated with the combination of the following proteins: 0.5  $\mu$ g MBP-GhHD1, 1  $\mu$ g MBP-GhHOX3, 1  $\mu$ g GST-YFP (as control) and 1  $\mu$ g GST-GhSLR1, as indicated on the top. Note that GhSLR1 inhibited the binding of GhHOX3/ GhHD1 to L1-box.



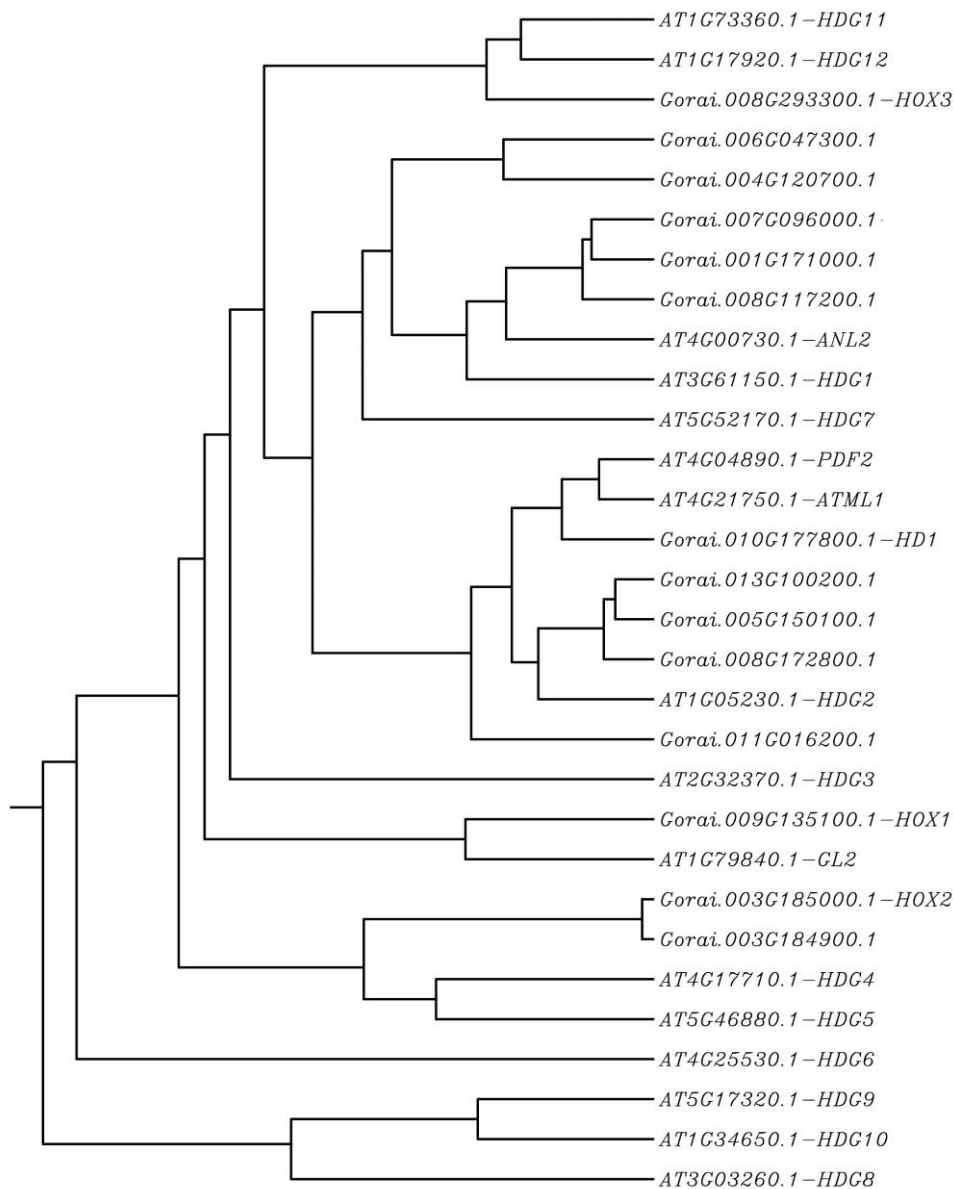

**Supplementary Figure 16** Cladogram of HD-ZIP IV subfamily members of *Arabidopsis thaliana* and the sequenced diploid cotton *Gossypium raimondii*. Amino acid sequences of HD-ZIP IV proteins were aligned by the CLUSTAL W (v1.81). Cotton HOX1, HOX2, HOX3 and HD1 are indicated.

Fig 3c

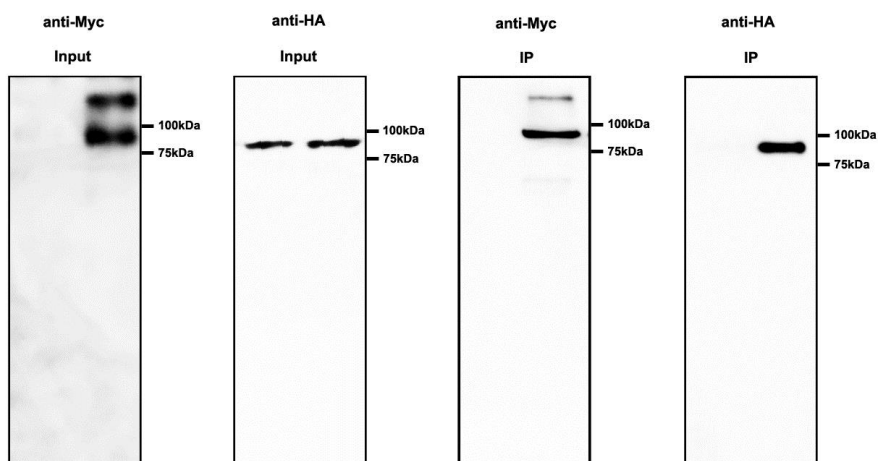

Fig 3f

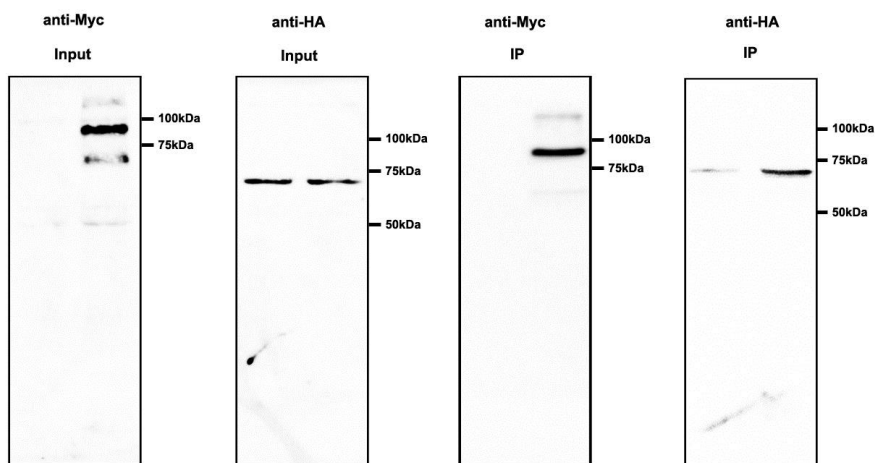

Supplementary Fig. 14

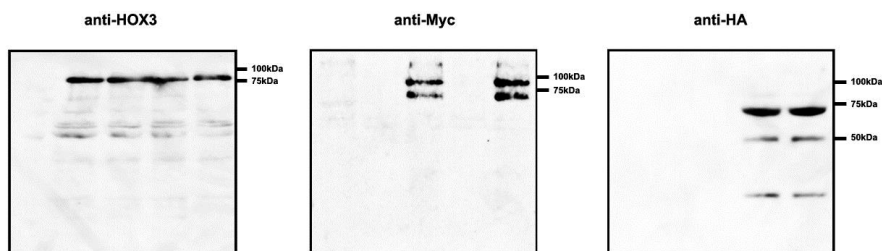

**Supplementary Figure 17** The whole view of immunoblot blots partially shown in Fig 3c, 3f and Supplementary Fig 14.

**Supplementary Table 1** Integration *GhHOX3* with previously reported QTLs.

| <b>Gene</b>   | <b>Subgenome</b> | <b>Chromosomal location</b> | <b>Previously reported QTL associated with specific chromosome<sup>a</sup></b> |
|---------------|------------------|-----------------------------|--------------------------------------------------------------------------------|
| <i>GhHOX3</i> | A                | A12                         | FL <sup>1,2,3</sup> ; FU <sup>1</sup> ; FF <sup>4</sup>                        |
|               | D                | D12                         | FL <sup>5</sup> ; FS <sup>2</sup> ;                                            |

FE, Elongation; FF, fineness; FL, length; FS, strength; FU, uniformity

**Supplementary Table 2** Association analysis of fiber qualities and SNPs in *GhHOX3-A* (located in chromosome A12, Chr.12).

| Fiber quality      | C(198) | T(83) | Difference | P value   | G(100) | A(81) | Difference | P value   |
|--------------------|--------|-------|------------|-----------|--------|-------|------------|-----------|
| Strength (cN/tex)  | 28.93  | 28.13 | 0.80**     | 2.329E-36 | 28.92  | 28.16 | 0.76**     | 1.205E-32 |
| Length (mm)        | 29.08  | 28.74 | 0.34**     | 1.682E-13 | 29.10  | 28.69 | 0.41**     | 1.885E-18 |
| Micronaire         | 4.48   | 4.46  | 0.02       | 0.1363    | 4.48   | 4.48  | 0.00       | 0.8257    |
| Uniformity Ratio % | 84.09  | 83.76 | 0.33**     | 8.965E-19 | 84.08  | 83.78 | 0.30**     | 3.008E-16 |

Data of fiber qualities of 281 cultivars or lines of Upland cotton (*G. hirsutum*). The number of cultivars/lines analyzed are indicated in bracket. A, adenine; C, cytosine; G, guanine; T, guanine. Data are shown in student's *t*-test (\* P <0.05; \*\* P<0.01).

**Supplementary Table 3** Fiber length and 100-seed-weight of T<sub>0</sub> plants of 35S::*GhHOX3* transgenic lines.

| Number of T <sub>0</sub> transgenic lines<br>(R15 as the WT control) | Fiber length (mm) | Weight of 100 seeds (g) |
|----------------------------------------------------------------------|-------------------|-------------------------|
| #1                                                                   | 26.03±1.21        | 10.10                   |
| #2                                                                   | 9.67±1.48**       | 10.23                   |
| #3                                                                   | 10.04±1.42**      | 10.76                   |
| #4                                                                   | 14.55±1.98**      | 9.04                    |
| #5                                                                   | 10.34±1.25**      | 8.92                    |
| #6                                                                   | 10.82±1.09**      | 12.25                   |
| WT                                                                   | 25.26±1.00        | 10.36                   |

Data are given as mean ± s.e.m., and analyzed in a student's *t*-test (\*P < 0.05; \*\*P < 0.01) compared to wild-type *G. hirsutum* cv. R15 (WT).

**Supplementary Table 4** Deduced GhHOX3 target genes containing L1-box in promoter.

| Custom ID | Gene Annotation (BLAST nr)                                                                                                                                                | L1-box location  |
|-----------|---------------------------------------------------------------------------------------------------------------------------------------------------------------------------|------------------|
| DR2       | gi 224064362 ref XP_002301438.1 /7.03976e-13/predicted protein<br>[ <i>Populus trichocarpa</i> ]                                                                          | -1751            |
| DR11      | gi 224085499 ref XP_002307596.1 /1.34009e-34/predicted protein<br>[ <i>Populus trichocarpa</i> ]                                                                          | -1413            |
| DR17      | gi 359478710 ref XP_002282495.2 /4.5478e-63/PREDICTED:<br>bifunctional monodehydroascorbate reductase and carbonic<br>anhydrase nectarin-3-like [ <i>Vitis vinifera</i> ] | -817             |
| DR20      | -                                                                                                                                                                         | -1533            |
| DR30      | gi 147785317 emb CAN72854.1 /8.06842e-17/hypothetical protein<br>VITISV_043216 [ <i>Vitis vinifera</i> ]                                                                  | -487             |
| DR45      | gi 30841320 gb AAO92740.1 /8.76353e-102/auxin binding protein<br>[ <i>Gossypium hirsutum</i> ]                                                                            | -330             |
| DR46      | gi 188509926 gb ACD56615.1 /3.50549e-51/predicted protein<br>[ <i>Gossypioides kirki</i> ]                                                                                | -253             |
| DR47      | -                                                                                                                                                                         | -1667            |
| DR51      | gi 224085499 ref XP_002307596.1 /6.80547e-34/predicted protein<br>[ <i>Populus trichocarpa</i> ]                                                                          | -1413            |
| DR54      | gi 225432018 ref XP_002273484.1 /4.4153e-36/PREDICTED:<br>putative invertase inhibitor [ <i>Vitis vinifera</i> ]                                                          | -1574            |
| DR55      | gi 224142001 ref XP_002324349.1 /1.50715e-141/predicted<br>protein [ <i>Populus trichocarpa</i> ]                                                                         | -781             |
| DR56      | gi 255572787 ref XP_002527326.1 /2.56946e-16/Vegetative cell wall<br>protein gp1 precursor, putative [ <i>Ricinus communis</i> ]                                          | -396, -568, -843 |
| DR59      | gi 255539022 ref XP_002510576.1 /3.79077e-50/skp1, putative<br>[ <i>Ricinus communis</i> ]                                                                                | -378,-1178       |
| DR70      | gi 229893912 gb ACQ90301.1 /1.53406e-43/squalene epoxidase<br>[ <i>Gynostemma pentaphyllum</i> ]                                                                          | -172             |
| DR72      | gi 133925931 gb ABO43717.1 /4.94432e-75/profilin [ <i>Gossypium<br/>hirsutum</i> ]                                                                                        | -928             |
| DR77      | gi 18447761 gb AAL67991.1 /1.46736e-149/dehydration-induced<br>protein RD22-like protein [ <i>Gossypium hirsutum</i> ]                                                    | -221             |
| DR78      | gi 324984057 gb ADY68811.1 /1.14956e-124/alpha-expansin 1<br>[ <i>Gossypium raimondii</i> ]                                                                               | -787             |

L1-box location: the distance (nt) of the L1-box *cis*-element to the coding region.

**Supplementary Table 5** Proteins interacting with GhHOX3 identified by yeast-two hybrid screen.

| <b>Putative protein type</b>                           | <b>Average frequency</b> |
|--------------------------------------------------------|--------------------------|
| Auxin response factor (ARF), auxin signaling regulator | 9                        |
| TCP family transcription factor                        | 8                        |
| CCR4-NOT complex subunit                               | 5                        |
| WRKY family transcription factor                       | 3                        |
| HD-ZIP IV family transcription factor                  | 3                        |
| C3H4-RING family protein                               | 3                        |
| Serine acetyltransferase                               | 3                        |
| JAZ protein, JA signaling repressor                    | 2                        |
| DELLA protein, GA signaling repressor                  | 2                        |
| ARR protein, cytokinin signaling regulator             | 2                        |

Yeast-two hybrid assay was repeated using GhHOX3-A and GhHOX3-D, respectively. Average frequency indicates the average numbers of clones obtained for each protein family.

**Supplementary Table 6** Oligonucleotide primers used in this investigation.

| <b>Primer</b>   | <b>Sequence(5'-3')</b>                | <b>Purpose</b>           |
|-----------------|---------------------------------------|--------------------------|
| SNP2560-F       | CACCAGTACAACCTGTTTCATATCTCTTCATTAGACT | EcoTILLING assay         |
| SNP2560-R1      | GATCTGAATTTGGCAACTATCCCCACTTG         | EcoTILLING assay         |
| SNP2560-R2      | CAACCAGAAGGGAGTCTATGAGATCGACATT       | EcoTILLING assay         |
| SNP2761-F       | AAATTATTTAGGCCCAATGTGTGAATAGGTGT      | EcoTILLING assay         |
| SNP2761-R1      | ATCTCCACATGTTCTAACCAAGTAACCTTGGAGT    | EcoTILLING assay         |
| SNP2761-R2      | CAACCAGAAGGGAGTCTATGAGATCGACATT       | EcoTILLING assay         |
| HOX3-ds1-SacI-F | CGAGCTC GGATGTGCGAATGGTTTGCTTG        | dsRNA                    |
| HOX3-ds1-NotI-R | ATTTGCGGCC GCGGACTGCGTTGCCGTTGGATAG   | dsRNA                    |
| HOX3-ds1-SmaI-F | TCCCCCGGG GGATGTGCGAATGGTTTGCTTG      | dsRNA                    |
| HOX3-ds1-XbaI-R | TGCTCTAGA GACTGCGTTGCCGTTGGATAG       | dsRNA                    |
| Kan-F           | GGCGATACCGTAAAGCACGAGGAA              | Transgene identification |
| Kan-R           | GCTATGACTGGGCACAACAGACAAT             | Transgene identification |
| pGhRDL1-F       | CTAGAGTTGCATCATGTTTTAT                | Gene cloning             |
| pGhRDL1-R       | CTAGAACAGGAGTGACTAATTCT               | Gene cloning             |
| pGhEXPA1-F      | ATCCCATCAAACCAATATCACC                | Gene cloning             |
| pGhEXPA1-R      | TTGAGTAAGAGCTAGCTAGCTCA               | Gene cloning             |
| pGhHOX3-F       | AGGCATATTCATCATTCCCCAC                | Gene cloning             |
| pGhHOX3-R       | AACGTCTCTCCTTTACGAAACACC              | Gene cloning             |
| GhHOX3-cds-F    | ATGGATTGCGGAAGCGGCGGC                 | Gene cloning             |
| GhHOX3-cds-R    | AGAACTAGGACAATTCAAAGC                 | Gene cloning             |
| GhHOX4-cds-F    | ATGGGCGTTGACAATAGAACAGCC              | Gene cloning             |
| GhHOX4-cds-R    | TTACTCAACAGATCCCAGCTGTGTTAC           | Gene cloning             |
| GhHOX5-cds-F    | ATGAGTTTTGGGGGATTTTTGG                | Gene cloning             |
| GhHOX5-cds-R    | TCAGCTTTCACATTGAAGGGCAGC              | Gene cloning             |
| GhHD1-cds-F     | ATGTTTAGCCCCAACTTATTTGAGAGT           | Gene cloning             |
| GhHD1-cds-R     | CGGTCAAGCATTATTGCACTTTAC              | Gene cloning             |
| GhSLR1-cds-F    | ATGAAGAGAGATCATCAAG                   | Gene cloning             |
| GhSLR1-cds-R    | ACTCAGCTCCTGAGTTAACTCACT              | Gene cloning             |
| GhHOX3-KpnI-F   | GGGGTACC ATGGATTGCGGAAGCGGC           | BiFc                     |
| GhHOX3-BamHI-R  | CGGGATCC AGAACTAGGACAATTCAAAGC        | BiFc                     |
| GhHD1-KpnI-F    | GGGGTACC ATGTTTAGCCCCAACTTATTTGAG     | BiFc                     |
| GhHD1-SalI-R    | GCGTCGAC TCAAGCATTATTGCACTTTACGGC     | BiFc                     |
| GhSLR1-KpnI-F   | GGGGTACC ATGAAGAGAGATCATCAAG          | BiFc                     |
| GhSLR1-SalI-A   | GCGTCGAC ACTCAGCTCCTGAGTTAACTCACT     | BiFc                     |
| GhHOX3-NdeI-F   | CGCCATATG ATGGATTGCGGAAGCGGCGGC       | Yeast hybrid             |
| GhHOX3-SmaI-R   | TCCCCCGGG AGAACTAGGACAATTCAAAGC       | Yeast hybrid             |
| GhHD1-NdeI-S    | CCCATATG ATGTTTAGCCCCAACTTATTTGAG     | Yeast hybrid             |
| GhHD1-SmaI-A    | TCCCCCGGG TCAAGCATTATTGCACTTTACGGC    | Yeast hybrid             |
| GhHD1-SmaI-S    | TCCCCCGGG G ATGTTTAGCCCCAACTTATTTGAG  | Yeast hybrid             |
| GhHD1-SalI-A    | GCGTCGAC TCAAGCATTATTGCACTTTACGGC     | Yeast hybrid             |
| Histone3-F      | GGCATACCTGTGGGTCTTTTTGA               | qRT-PCR                  |



| <b>Primer</b> | <b>Sequence(5'-3')</b>     | <b>Purpose</b> |
|---------------|----------------------------|----------------|
| Histone3-R    | CTACCACTACCATCATGGC        | qRT-PCR        |
| GhHOX1-RT-F   | ATATTACCTTCAGGCTTCTC       | qRT-PCR        |
| GhHOX1-RT-R   | TCACCCATCTTCACATTGCA       | qRT-PCR        |
| GhHOX2-RT-F   | GAAGCAAATGGGCATAATAT       | qRT-PCR        |
| GhHOX2-RT-R   | CTATTTTTCTTTACCATTGT       | qRT-PCR        |
| GhHOX3-RT-F   | ATTATGAATGGCTTAGCTTTGG     | qRT-PCR        |
| GhHOX3-RT-R   | ACTGCGTTGCCGTTGGATAG       | qRT-PCR        |
| GhHD1-RT-F    | GTTATGACCCGAAAGAGCA        | qRT-PCR        |
| GhHD1-RT-R    | CATCCCTTAGGAAATCAAATAC     | qRT-PCR        |
| GhSLR1-RT-F   | TGAACAAGAAGCGAATCACAACGGT  | qRT-PCR        |
| GhSLR1-RT-R   | TAAGTATAACTCGGACATAGCCAGG  | qRT-PCR        |
| GhRDL1-RT-F   | ATACCGTTTTTCATCTGACAAGTTGC | qRT-PCR        |
| GhRDL1-RT-R   | CAGCTGCTATTGTATACTTTTGCA   | qRT-PCR        |
| GhEXPA1-RT-F  | GCAGGACTATCACAGCCTACAA     | qRT-PCR        |
| GhEXPA1-RT-R  | ATGGCACTTGCTCGCCTATTT      | qRT-PCR        |
| GhEXPA2-RT-F  | CAACATGGTGTTGATAACCG       | qRT-PCR        |
| GhEXPA2-RT-R  | AGTTTGGTTCACTATTAGG        | qRT-PCR        |
| DR2-RT-F      | GACGACGAAGAGCAGAGAA        | qRT-PCR        |
| DR2-RT-R      | ACGATCAAATGACCAAGTG        | qRT-PCR        |
| DR3-RT-F      | TTGGTTCCAATGTGGTGTTT       | qRT-PCR        |
| DR3-RT-R      | TTTCGTTCCCATATGTTCT        | qRT-PCR        |
| DR5-RT-F      | CTGCCTAACTGTTGCCTCAC       | qRT-PCR        |
| DR5-RT-R      | TATTCACTCCTCATCTGGA        | qRT-PCR        |
| DR6-RT-F      | TCTCAAAAGTATTGGTCATAT      | qRT-PCR        |
| DR6-RT-R      | TTCTCTTCTCCGTAAAGTGG       | qRT-PCR        |
| DR7-RT-F      | AGCACAGTCGCTAGAAGCGGT      | qRT-PCR        |
| DR7-RT-R      | GACACAAGGGAAGAAAAAATC      | qRT-PCR        |
| DR8-RT-F      | AAGGAGAAAATGAAGAAGATG      | qRT-PCR        |
| DR8-RT-R      | AAACCCAGGAGAAACAAGAAG      | qRT-PCR        |
| DR9-RT-F      | CCTTACAACGAACCGTCCCAC      | qRT-PCR        |
| DR9-RT-R      | CATTCTCCGCTTTCCACCCC       | qRT-PCR        |
| DR10-RT-F     | AGACAAAACAAAACAGGAATAA     | qRT-PCR        |
| DR10-RT-R     | ACAGTGAAAAGAGGAAAAGAAA     | qRT-PCR        |
| DR11-RT-F     | ACGGTGGTGCTTCATCACTTG      | qRT-PCR        |
| DR11-RT-R     | TTGTTGGAACACTACTCTTTG      | qRT-PCR        |
| DR12-RT-F     | TGTTGGGTTTTTCAAGCATGG      | qRT-PCR        |
| DR12-RT-R     | AATTGGTAATCTGGGAAGTGG      | qRT-PCR        |
| DR13-RT-F     | TGCTATCGCCTTTCCATCTCTG     | qRT-PCR        |
| DR13-RT-R     | GATCAATTTTCATCCTGTTCCGGG   | qRT-PCR        |
| DR15-RT-F     | TGAGAATAATGCGACGAAGCCA     | qRT-PCR        |
| DR15-RT-R     | CTCCATAATCCAAGGGACCAGA     | qRT-PCR        |
| DR16-RT-F     | GCAGCAAGCCGGCAGCCGGGAC     | qRT-PCR        |
| DR16-RT-R     | CATCTGTATGATTTAAGAACAG     | qRT-PCR        |

| <b>Primer</b> | <b>Sequence(5'-3')</b>  | <b>Purpose</b> |
|---------------|-------------------------|----------------|
| DR17-RT-F     | CAGCGACGGACGAAAGCAATCT  | qRT-PCR        |
| DR17-RT-R     | CCCTGACCATAACCACCGCAACA | qRT-PCR        |
| DR18-RT-F     | AAGATGTGTGGATATGAAGACG  | qRT-PCR        |
| DR18-RT-R     | AAATGAAGATGATGAGGCAGTA  | qRT-PCR        |
| DR19-RT-F     | ATAGCCACCGTCACCTTCGCAG  | qRT-PCR        |
| DR19-RT-R     | TAATAGATTATCCAGAACCCCA  | qRT-PCR        |
| DR20-RT-F     | GATGGTAGATCTAGGATTGAAG  | qRT-PCR        |
| DR20-RT-R     | GCCATTTGCATATTTACCGGTA  | qRT-PCR        |
| DR21-RT-F     | AGATGACAAACGAGACACCACA  | qRT-PCR        |
| DR21-RT-R     | TCTTCCGCACAAATACAGCCCA  | qRT-PCR        |
| DR23-RT-F     | GGGAAACAGCAACACCATGATC  | qRT-PCR        |
| DR23-RT-R     | TAGTGCCACAGGTGCAGTCTG   | qRT-PCR        |
| DR24-RT-F     | ACACATCCGCACACAACCCCTG  | qRT-PCR        |
| DR24-RT-R     | GGAAGTCCATCACCCTTCCAC   | qRT-PCR        |
| DR25-RT-F     | AAAGCCGACAAAAATCAGAGAA  | qRT-PCR        |
| DR25-RT-R     | CAAACCACAAAGAGAGGGGACA  | qRT-PCR        |
| DR26-RT-F     | CTTCAACCCTGGCCTACTCTCC  | qRT-PCR        |
| DR26-RT-R     | CCAAGCATCACTCCGTTTCTTC  | qRT-PCR        |
| DR27-RT-F     | TGAAGAGTTATAGAGGGGTGAG  | qRT-PCR        |
| DR27-RT-R     | TTCGATGGGGAAATTGAGAGTA  | qRT-PCR        |
| DR28-RT-F     | GTCGTCAAAGACTCGGGAATCG  | qRT-PCR        |
| DR28-RT-R     | ACCCTGGCTATGAAATCATCAG  | qRT-PCR        |
| DR29-RT-F     | GCCATATCCCCAGTATCAAACA  | qRT-PCR        |
| DR29-RT-R     | TTCAAAATCAAACCATCCCATT  | qRT-PCR        |
| DR30-RT-F     | AAAGAAAACAAGATCCCAGCAG  | qRT-PCR        |
| DR30-RT-R     | TAGAGTGAGAATCATCAAAGC   | qRT-PCR        |
| DR32-RT-F     | TGCCTCTCATTATTACCGACG   | qRT-PCR        |
| DR32-RT-R     | AGACCCAACCACCATCCAACC   | qRT-PCR        |
| DR33-RT-F     | CATACAAGGATGGTGGAGAAAT  | qRT-PCR        |
| DR33-RT-R     | GCAGCTCAGGATCAGTAAAAC   | qRT-PCR        |
| DR34-RT-F     | TAAAGACGGGGAATGGGTGGAT  | qRT-PCR        |
| DR34-RT-R     | TCGCTGCCGGGTTGTAAAACG   | qRT-PCR        |
| DR35-RT-F     | AATGCCAGTTATTATCGGCCGA  | qRT-PCR        |
| DR35-RT-R     | AACAATTGAGAGACGAAGGTTTC | qRT-PCR        |
| DR37-RT-F     | ATTCTCAGCAAGTGTCCGTCAA  | qRT-PCR        |
| DR37-RT-R     | ATCCCTAATCCTCAGCATCCCC  | qRT-PCR        |
| DR38-RT-F     | GTCTCATACTGGATTATTTGG   | qRT-PCR        |
| DR38-RT-R     | GAAGCATTCTCTCCCTCGCCTT  | qRT-PCR        |
| DR39-RT-F     | TTACTCCGGCCTCGCTGCCACA  | qRT-PCR        |
| DR39-RT-R     | TTGAATAACAACAAGGACTTCA  | qRT-PCR        |
| DR40-RT-F     | CAAGGACAAGGCAGTCACAGGA  | qRT-PCR        |
| DR40-RT-R     | GGGTCGAAGTTGGACACACCAA  | qRT-PCR        |
| DR41-RT-F     | AGAAATACAAACACTTCGTCAA  | qRT-PCR        |

| <b>Primer</b> | <b>Sequence(5'-3')</b> | <b>Purpose</b> |
|---------------|------------------------|----------------|
| DR41-RT-R     | TAGTTCCTCAGCCTATGCTCAC | qRT-PCR        |
| DR42-RT-F     | ATTGCACCGACTTGATCTTAGC | qRT-PCR        |
| DR42-RT-R     | TATTTTGTTCATTATTTTCCT  | qRT-PCR        |
| DR44-RT-F     | TTGTCGCTTTGTTCTTCCATCC | qRT-PCR        |
| DR44-RT-R     | TGCCTTCCATTATTAGCCTTCG | qRT-PCR        |
| DR45-RT-F     | CAGCCGACTTCTGTGTTGGGGA | qRT-PCR        |
| DR45-RT-R     | CTGGTGTTATTGCAGCTTTTAC | qRT-PCR        |
| DR46-RT-F     | TATTGGGGTTTGCCCTTTGTGC | qRT-PCR        |
| DR46-RT-R     | GGGAGCTTGTTGATGGGTGGTT | qRT-PCR        |
| DR47-RT-F     | AGGGGTCAAGTTAAGATGAGAA | qRT-PCR        |
| DR47-RT-R     | CAGAAAGGTAGCCGTTGGGGT  | qRT-PCR        |
| DR48-RT-F     | CAAACTACAAACCATCATTCG  | qRT-PCR        |
| DR48-RT-R     | AGCAACATCATCCATAAACCTA | qRT-PCR        |
| DR49-RT-F     | AGTTCGACACGTCTTTCTTCAC | qRT-PCR        |
| DR49-RT-R     | TACCCGTCTTCACACCTATATT | qRT-PCR        |
| DR50-RT-F     | GTTGATATCCCCAACCAACA   | qRT-PCR        |
| DR50-RT-R     | TCACAAACACCAGCAGTGCCTC | qRT-PCR        |
| DR52-RT-F     | GAAGAAGATGATGCTGGTTATG | qRT-PCR        |
| DR52-RT-R     | CTCGTTGTAGGGGAGGAGGTGG | qRT-PCR        |
| DR53-RT-F     | CTTTCGCCTCTCTTCTTTACCA | qRT-PCR        |
| DR53-RT-R     | AAACCCATCACTTTCATCCTCA | qRT-PCR        |
| DR55-RT-F     | GTCGCCTCTCTTTACCCTCTT  | qRT-PCR        |
| DR55-RT-R     | ATTGACTTCACCCTTACTTCGT | qRT-PCR        |
| DR57-RT-F     | ATGCCTTCCCTCCTTGCCAAAC | qRT-PCR        |
| DR57-RT-R     | ACTCATTCTTCCAATAATACCC | qRT-PCR        |
| DR58-RT-F     | GAGTTGAACATGGGGTTAAAAG | qRT-PCR        |
| DR58-RT-R     | CAAGCAGAGAAAGAGTAGAGGG | qRT-PCR        |
| DR60-RT-F     | GCTTCAATCGATAATACTACCG | qRT-PCR        |
| DR60-RT-R     | TGTTTCAGCCTCATTTCCACCA | qRT-PCR        |
| DR61-RT-F     | GCTCCTGTTGCTGACCCAAACC | qRT-PCR        |
| DR61-RT-R     | CTGATCCATTATCGACAATCTC | qRT-PCR        |
| DR62-RT-F     | CTAACTCCACCATCGTCCACAG | qRT-PCR        |
| DR62-RT-R     | ACTTGAAAATCACAAATCCCAA | qRT-PCR        |
| DR63-RT-F     | ATGGGAAAGGAGATGAGGCATT | qRT-PCR        |
| DR63-RT-R     | CCAACACTGGAGAATTAGATGT | qRT-PCR        |
| DR64-RT-F     | GCCTCCCACGCTGCCTTCCTTT | qRT-PCR        |
| DR64-RT-R     | ATGTATCACCACAGAGCGGTTT | qRT-PCR        |
| DR65-RT-F     | TGTTCTTTACATCTGCTTTGGA | qRT-PCR        |
| DR65-RT-R     | AACCTTGCCCGTTTTTGTCTC  | qRT-PCR        |
| DR66-RT-F     | TACTCTTTAAAATCTCAGTAGC | qRT-PCR        |
| DR66-RT-R     | TGTAGAAGTTGAAGGAGGTCCG | qRT-PCR        |
| DR68-RT-F     | GTCGGATTGGGGTCCCGTTTTT | qRT-PCR        |
| DR68-RT-R     | CAAATGAACCTTAACCGCCAGC | qRT-PCR        |

| Primer    | Sequence(5'-3')         | Purpose |
|-----------|-------------------------|---------|
| DR69-RT-F | ATGGTCGATAGTGGATCCGAGC  | qRT-PCR |
| DR69-RT-R | ACACAAAAGGCCAAAAAGTGAGG | qRT-PCR |
| DR70-RT-F | CAAAGACTACGAAAGAAAGCCG  | qRT-PCR |
| DR70-RT-R | ATCACAGACGATGGTGAGAGGA  | qRT-PCR |
| DR71-RT-F | GCTTTGCTCCCTTGTTCTTATT  | qRT-PCR |
| DR71-RT-R | ACACCTGTTGCCCAGGTTGTCT  | qRT-PCR |
| DR72-RT-F | TGGGCTCAGAGCTCTAACTCC   | qRT-PCR |
| DR72-RT-R | CACCCCTCCAGATCCCTTTTTT  | qRT-PCR |
| DR73-RT-F | GAAGATAAAAATACCCAAACCTT | qRT-PCR |
| DR73-RT-R | TCGAATCGACCGAAACCAAGAT  | qRT-PCR |
| DR74-RT-F | TTACATCCCTCGATCACCGCCT  | qRT-PCR |
| DR74-RT-R | TCCACTAACAATCACTGCCACA  | qRT-PCR |
| DR75-RT-F | ACACATCACATTACGACTCTGC  | qRT-PCR |
| DR75-RT-R | TGTTTCTGTACCTTATTGCCCC  | qRT-PCR |
| DR76-RT-F | ATCATGCGGTGTATCGATGTCC  | qRT-PCR |
| DR76-RT-R | CAGCTTCTCAATCTCCTTGCGC  | qRT-PCR |

## Supplementary References

- 1 Luan, M., Guo, X., Zhang, Y., Yao, J. & Chen, W. QTL mapping for agronomic and fibre traits using two interspecific chromosome substitution lines of Upland cotton. *Plant breeding* **128**, 671-679 (2009).
- 2 Lin, Z.-X. *et al.* Linkage map construction and mapping QTL for cotton fibre quality using SRAP, SSR and RAPD. *Plant breeding* **124**, 180-187 (2005).
- 3 Qin, H., Guo, W., Zhang, Y.-M. & Zhang, T. QTL mapping of yield and fiber traits based on a four-way cross population in *Gossypium hirsutum* L. *Theoretical and Applied Genetics* **117**, 883-894 (2008).
- 4 Shen, X. *et al.* Molecular mapping of QTLs for fiber qualities in three diverse lines in Upland cotton using SSR markers. *Molecular breeding* **15**, 169-181 (2005).
- 5 He, D.-H. *et al.* QTL mapping for economic traits based on a dense genetic map of cotton with PCR-based markers using the interspecific cross of *Gossypium hirsutum* × *Gossypium barbadense*. *Euphytica* **153**, 181-197 (2007).
